# Supplementary material for: Development of Newly Synthesized Chromone Derivatives with High Tumor Specificity against Human Oral Squamous Cell Carcinoma
Source: Medicines (Basel). 2020 Aug 26;7(9):50. doi: 10.3390/medicines7090050 (PMC7555025; doi:10.3390/medicines7090050)
Supplement: Supplementary file 1 [file medicines-07-00050-s001.xlsx]

## Sheet: S1
	Supplementary Table S1
				CC50 (μM)
				Humna oral squamous cell carcinoma cell lines						Human normal oral cells
				Ca9-22	HSC-2	HSC-3	HSC-4	mean		HGF	HPLF	HPC	mean		TSM			PSE
				A				B		C			D		D/B	C/A		100D/B2	100C/A2	Ref.
	3-Styrylchromones (A)	1	(E)-3-(4-methoxystyryl)-4H-chromen-4-one (1)	183	94	200	80	139		643	533	475	550		4	3.5		2.8777	0.544323	33
		2	(E)-3-(3,4-dimethoxystyryl)-4H-chromen-4-one (2)	41	82	41	77	60		64	68	156	96		1.6	1.6		2.66667	2.5
		3	(E)-3-(3,4,5-trimethoxystyryl)-4H-chromen-4-one (3)	263	300	278	310	288		560	518	715	598		2.1	2.1		0.729167	0.375
		4	(E)-6-methoxy-3-(4-methoxystyryl)-4H-chromen-4-one (4)	4.4	4.4	7.7	9.2	6.4		229	150	396	258		40.3	52		629.687	22.7074
		5	(E)-6-methoxy-3-(3,4-dimethoxystyryl)-4H-chromen-4-one (5)	33	92	36	61	56		98	83	171	117		2.1	3		3.75	3.06122
		6	(E)-6-methoxy 3-(3,4,5-trimethoxystyryl)-4H-chromen-4-one (6)	10	6.8	21	13	13		544	190	284	339		26.1	54.4		200.769	10
		7	(E)-3-(4-fluorostyryl)-6-methoxy-4H-chromen-4-one (7)	43	57	58	38	49		140	126	97	121		2.5	3.3		5.10204	2.35714
		8	(E)-3-(4-chlorostyryl)-6-methoxy-4H-chromen-4-one (8)	13	48	83	204	87		554	657	733	648		7.4	42.6		8.50575	7.68953
		9	(E)-3-(4-hydroxystyryl)-4H-chromen-4-one (9)	23	25	14	28	23		457	520	600	526		22.9	19.9		99.5652	4.35449
		10	(E)-3-(3,4-dihydroxystyryl)-4H-chromen-4-one (10)	33	6.3	24	6.3	17		154	141	241	179		10.5	4.7		61.7647	3.05195
		11	(E)-3-(4-hydroxystyryl)-6-methoxy-4H-chromen-4-one (11)	2.1	1	3.6	1.2	2		67	74	272	138		69	31.9		3450	47.6119
		12	(E)-3-(3,4-dihydroxystyryl)-6-methoxy-4H-chromen-4-one (12)	25	2.4	32	3.3	16		161	187	267	205		12.8	6.4		80	3.97516
		13	(E)-6-hydroxy-3-(4-methoxystyryl)-4H-chromen-4-one (13)	>800	>800	240	>800	>660		>800	>800	>800	>800		1.2	1		><0.2	><0.1
		14	(E)-6-hydroxy-3-(4-hydroxystyryl)-4H-chromen-4-one (14)	19	11	11	15	14		19	31	80	43		3.1	1		22.1429	5.26316
		15	(E)-6-hydroxy-3-(3,4-dihydroxystyryl)-4H-chromen-4-one (15)	33	9.1	22	7.5	18		247	222	507	325		18.1	7.4		100.556	2.99595
	3-Styrylchromones (A)	16	3-​[(1E)​-​2-phenylethenyl]​-4H-1-​benzopyran-​4-​one (1)	78.3333	152.333	150.667	201	145.583		380.333	387.333	234.333	334		2.29422	4.85532		1.57588	6.19828	34
		17	3-​[(1E)​-​2-​(4-​fluorophenyl)​ethenyl]​-4H-1-​benzopyran-​4-​one (2)	19.6333	17	23.6	19.6333	19.9667		21.5667	23.6	23.4333	22.8667		1.14524	1.09847		5.73577	5.59493
		18	3-​[(1E)​-​2-​(4-​chlorophenyl)​ethenyl]​-4H-​1-​benzopyran-​4-​one (3)	4.68167	5.9	4.56667	6.08333	5.30792		4.975	3.125	3.125	3.74167		0.704922	1.06266		13.2806	22.6982
		19	3-​[(1E)​-​2-​(4-​dimethyaminophenyl)​ethenyl]​-4H-​1-​benzopyran-​4-​one (4)	9.2	5.5	20	24.4667	14.7917		400	3.38667	27	143.462		9.69885	43.4783		65.5697	472.59
		20	6-methoxy-3-​[(1E)​-​2-​phenylethenyl]​-4H-​1-​benzopyran-​4-​one (5)	102.333	127	91.2667	11.6667	83.0667		147.333	21.5667	22.9667	63.9556		0.76993	1.43974		0.926883	1.40691
		21	3-​[(1E)​-​2-​(4-​dimethyaminophenyl)​ethenyl]-6-methoxy​-4H-​1-​benzopyran-​4-​one (6)	7.52333	3.125	6.16667	9.36667	6.54542		6.75	5.20333	6.33333	6.09556		0.931271	0.897209		14.2278	11.9257
		22	7-methoxy-3-​[(1E)​-​2-​phenylethenyl]​-4H-​1-​benzopyran-​4-​one (7)	0.53	0.503333	0.383333	1	0.604167		400	24.4667	121.333	181.933		301.131	754.717		49842.4	142399
		23	3-​[(1E)​-​2-​(4-​fluorophenyl)​ethenyl]​-7-methoxy-4H-​1-​benzopyran-​4-​one (8)	1.09333	0.93	0.79	1.51333	1.1		5.9	3.125	3.125	4.05		3.74422	5.39634		346.153	493.568
		24	3-​[(1E)​-​2-​(4-​chlorophenyl)​ethenyl]​-7-methoxy-4H-​1-​benzopyran-​4-​one (9)	50	7.29167	54.8333	171	70.7812		400	68.75	46	171.583		2.42414	8		3.42483	16
		25	3-​[(1E)​-​2-​(4-​dimethyaminophenyl)​ethenyl]-7-methoxy​-4H-​1-​benzopyran-​4-​one (10)	24.3333	11.1333	23.1667	78.2333	34.2167		400	15.9	53.6	156.5		4.57379	16.4384		13.3672	67.5549
		26	7-methoxy-3-​[(1E)​-​2-​(4-​methoxyphenyl)​ethenyl]​-4H-​1-​benzopyran-​4-​one (11)	34.3333	3.125	26.1667	21.7667	21.3479		383.333	3.44167	10.9333	132.569		6.20995	11.165		29.0892	32.5196
		27	3-​[(1E)​-​2-​(3,4-di​methoxyphenyl)​ethenyl]​-7-methoxy-4H-​1-​benzopyran-​4-​one (12)	21	18.5667	21.3333	19	19.975		400	32.9	116	182.967		9.15978	19.0476		45.8562	90.7029
		28	7-methoxy-3-​[(1E)​-​2-​(3,4,5-tri​methoxyphenyl)​ethenyl]​-4H-​1-​benzopyran-​4-​one (13)	18.7333	46.3	25.9	29.1667	30.025		82.0833	113.333	80	91.8056		3.05764	4.38167		10.1836	23.3897
		29	3-​[(1E)​-​2-​(4-hydroxyphenyl)​ethenyl]​-7-methoxy-4H-​1-​benzopyran-​4-​one (14)	0.636667	1.11667	0.316667	0.54	0.6525		283.333	33	40	118.778		182.035	445.026		27898.1	69899.4
	2-Styrylchromones (B)	30	2-​[(1E)​-​2-​phenylethenyl]​-4H-​1-​benzopyran-​4-​one (1)	23.3	57	46	24.3333	37.6583		79.6667	109.333	48.6667	79.2222		2.10371	3.41917		5.58631	14.6746	37
		31	2-​[(1E)​-​2-​(4-​fluorophenyl)​ethenyl]​-4H-​1-​benzopyran-​4-​one (2)	28.5333	13	33.6667	3.875	19.7687		264	248.667	14	175.556		8.88046	9.25234		44.9217	32.4264
		32	2-[(1E)-2-(4-chlorophenyl)ethenyl]-4H-1-benzopyran-4-one (3)	8.6	6.3	11.4	15.9667	10.5667		281	333	40.3333	218.111		20.6414	32.6744		195.345	379.935
		33	2-​[(1E)​-​2-​(4-bromophenyl)​ethenyl]​-4H-​1-​benzopyran-​4-​one (4)	32.3333	20.6667	21.5333	23.4	24.4833		154.667	39.3333	14.4667	69.4889		2.83821	4.78351		11.5924	14.7943
		34	2-​[(1E)​-​2-​(4-​methoxyphenyl)​ethenyl]​-4H-​1-​benzopyran-​4-​one (5)	1.95667	1.86	1.19333	2.56	1.8925		290.667	142	44.7667	159.144		84.0922	148.552		4443.44	7592.09
		35	2-​[(1E)​-​2-​(3,4-dimethoxy)​ethenyl]​-4H-​1-​benzopyran-​4-​one (6)	32.6667	65	39.6667	44.3333	45.4167		80.6667	207.667	11	99.7778		2.19694	2.46939		4.8373	7.55935
		36	6-methoxy-2-​[(1E)​-​2-phenylethenyl]​-4H-​1-​benzopyran-​4-​one (7)	28.3333	51.6667	36.6667	33.6667	37.5833		250.333	209.333	183	214.222		5.69993	8.83529		15.1661	31.1834
		37	2-​[(1E)​-​2-​(4-​fluorophenyl)​ethenyl]-6-methoxy-4H-​1-​benzopyran-​4-​one (8)	23.6333	200.333	30.6667	15.4	67.5083		269	343	13.6667	208.556		3.08933	11.3822		4.57622	48.1618
		38	2-​[(1E)​-​2-​(4-​chlorophenyl)​ethenyl]-6-methoxy-4H-​1-​benzopyran-​4-​one (9)	3.125	32.6667	13.9667	9.63333	14.8479		400	400	144.667	314.889		21.2076	128		142.832	4096
		39	2-​[(1E)​-​2-​(4-bromophenyl)​ethenyl]-6-methoxy​-4H-​1-​benzopyran-​4-​one (10)	5.06667	24.6667	10.4667	22.2	15.6		93.3333	158	9.63333	86.9889		5.57621	18.4211		35.7449	363.573
		40	6-methoxy-2-​[(1E)​-​2-​(4-​methoxyphenyl)​ethenyl]​-4H-​1-benzopyran-​4-​one (11)	2.9	4.53333	2.77333	4.86333	3.7675		297	400	310	335.667		89.0953	102.414		2364.84	3531.51
		41	2-​[(1E)​-​2-​(3,4-dimethoxy)​ethenyl]-6-methoxy-​4H-​1-​benzopyran-​4-​one (12)	283	400	173	170.667	256.667		363.667	315.667	268.333	315.889		1.23074	1.28504		0.479508	0.454078
		42	7-methoxy-2-​[(1E)​-​2-phenylethenyl]​-4H-​1-​benzopyran-​4-​one (13)	75.6667	128.667	87	170.667	115.5		218.333	346.667	127.667	230.889		1.99904	2.88546		1.73077	3.81339
		43	2-​[(1E)​-​2-​(4-​fluorophenyl)​ethenyl]-7-methoxy-4H-​1-​benzopyran-​4-​one (14)	9.8	16.0667	12.0667	13	12.7333		310.333	344.333	8.23333	220.967		17.3534	31.6667		136.283	323.129
		44	2-​[(1E)​-​2-​(4-​chlorophenyl)​ethenyl]-7-methoxy-4H-​1-​benzopyran-​4-​one (15)	22.7	84.3333	135.333	29.6667	68.0083		23.6667	105.333	5.3	44.7667		0.658253	1.04258		0.9679	4.59288
		45	2-​[(1E)​-​2-​(4-bromophenyl)​ethenyl]-7-methoxy​-4H-​1-​benzopyran-​4-​one (16)	69	88.6667	77.3333	28	65.75		33.6667	40	8.23333	27.3		0.415209	0.487923		0.631497	0.707134
		46	7-methoxy-2-​[(1E)​-​2-​(4-​methoxyphenyl)​ethenyl]​-4H-​1-​benzopyran-​4-​one (17)	31.3333	82.3333	39	45.3333	49.5		191.667	200	206.333	199.333		4.02694	6.11702		8.13522	19.5224
		47	2-​[(1E)​-​2-​(3,4-dimethoxy)​ethenyl]-7-methoxy-​4H-​1-​benzopyran-​4-​one (18)	18.9	65.3333	82.3333	60	56.6417		334.333	400	82.3333	272.222		4.80604	17.6896		8.48499	93.5957
	2-(N-Cyclicamino)chromones (C)	48	2-​(1-​piperidinyl)​-4H-​1-​benzopyran-​4-​one (1a)	391	400	400	400	397.75		298.667	400	400	366.222		0.920735	0.763853		0.231486	0.195359	38
		49	6-​methoxy-​2-​(1-​piperidinyl)​-4H-​1-​benzopyran-​4-​one (1b)	400	400	325.333	382	376.833		341	350	400	363.667		0.96506	0.8525		0.256097	0.213125
		50	7-​methoxy-​2-​(1-​piperidinyl)​-4H-​1-​benzopyran-​4-​one (1c)	400	396.333	400	366.333	390.667		275	360.667	400	345.222		0.883675	0.6875		0.226197	0.171875
		51	2-​(4-​phenyl-​1-​piperidinyl)​-4H-​1-​benzopyran-​4-​one (2a)	247.667	278.567	347.667	255.333	282.308		268	220.333	195	227.778		0.80684	1.0821		0.285801	0.436918
		52	6-​methoxy-​2-​(4-​phenyl-​1-​piperidinyl)​-4H-​1-​benzopyran-​4-​one (2b)	400	400	400	400	400		400	400	400	400		1	1		0.25	0.25
		53	7-​methoxy-​2-​(4-​phenyl-​1-​piperidinyl)​-4H-​1-​benzopyran-​4-​one (2c)	400	400	359	400	389.75		291.667	271.333	367.333	310.111		0.795667	0.729167		0.204148	0.182292
		54	2-​(4-​phenyl-​1-​piperazinyl)​-4H-​1-​benzopyran-​4-​one (3a)	121.467	126.333	174	96.8333	129.658		241.667	260.333	173.333	225.111		1.73619	1.98957		1.33905	1.63796
		55	6-​methoxy-​2-​(4-​phenyl-​1-​piperazinyl)​-4H-​1-​benzopyran-​4-​one (3b)	286.167	279.6	199.333	208.667	243.442		263.333	266	274	267.778		1.09997	0.92021		0.45184	0.321564
		56	7-​methoxy-​2-​(4-​phenyl-​1-​piperazinyl)​-4H-​1-​benzopyran-​4-​one (3c)	85.3	75.9667	119.333	91.4333	93.0083		195.667	229	400	274.889		2.95553	2.29386		3.1777	2.68917
		57	2-​(4-​methyl-​1-​piperazinyl)​-4H-​1-​benzopyran-​4-​one (4a)	400	400	400	400	400		400	400	388	396		0.99	1		0.2475	0.25
		58	6-​methoxy-​2-​(4-​methyl-​1-​piperazinyl)​-4H-​1-​benzopyran-​4-​one (4b)	400	400	400	400	400		400	400	400	400		1	1		0.25	0.25
		59	7-​methoxy-​2-​(4-​methyl-​1-​piperazinyl)​-4H-​1-​benzopyran-​4-​one (4c)	400	400	400	393	398.25		400	400	400	400		1.00439	1		0.252202	0.25
		60	2-​(4-​morpholinyl)​-4H-​1-​benzopyran-​4-​one (5a)	344.667	312.333	400	360.333	354.333		400	400	154	318		0.89746	1.16054		0.253281	0.336714
		61	6-​methoxy-​2-​(4-​morpholinyl)​-4H-​1-​benzopyran-​4-​one (5b)	400	258.333	400	326.333	346.167		392	400	400	397.333		1.14781	0.98		0.331577	0.245
		62	7-​methoxy-​2-​(4-​morpholinyl)​-4H-​1-​benzopyran-​4-​one (5c)	9.14	5.98	3.72	3.1	5.485		243.667	400	400	347.889		63.4255	26.6594		1156.34	291.678
	3-(N-Cyclicamino)chromones (D)	63	3-​(1-​piperidinyl)​-4H-​1-​benzopyran-​4-​one (1a)	305.333	251	268.333	360	296.167		380	398	>400	392.667		1.32583	1.24454		0.447663	0.407601	39
		64	6-​methoxy-​3-​(1-​piperidinyl)​-4H-​1-​benzopyran-​4-​one (1b)	300.333	294.667	278	370.333	310.833		329.667	358	323.333	337		1.08418	1.09767		0.348799	0.365484
		65	7-​methoxy-​3-​(1-​piperidinyl)​-4H-​1-​benzopyran-​4-​one (1c)	294	281.333	189.333	400	291.167		305	307.5	325	312.5		1.07327	1.03741		0.36861	0.352862
		66	3-​(4-​phenyl-​1-​piperidinyl)​-4H-​1-​benzopyran-​4-​one (2a)	42.7333	30.6667	85.6667	40.4	49.8667		357.667	>400	>400	>386		>7.7	8.36973		>15.5	19.586
		67	6-​methoxy-3-​(4-​phenyl-​1-​piperidinyl)​-4H-​1-​benzopyran-​4-​one (2b)	50.3	21.7333	209.333	85.3333	91.675		271.667	181	221	224.556		2.44947	5.40093		2.67191	10.7374
		68	7-​methoxy​-3-​(4-​phenyl-​1-​piperidinyl)​-4H-​1-​benzopyran-​4-​one (2c)	92.6667	74.8333	389	400	239.125		>400	>400	>400	>400		>1.7	>4.3		>0.7	>4.7
		69	3-​(4-​phenyl-​1-​piperazinyl)​-4H-​1-​benzopyran-​4-​one (3a)	46	20	36.6667	26.3333	32.25		390.333	>400	>400	>397		>12.3	8.48551		>38.1	18.4468
		70	6-​methoxy-​3-​(4-​phenyl-​1-​piperazinyl)​-4H-​1-​benzopyran-​4-​one (3b)	34.6667	9.1	176	64.5333	71.075		392.667	287.5	316.667	332.278		4.67503	11.3269		6.5776	32.6738
		71	7-​methoxy-​3-​(4-​phenyl-​1-​piperazinyl)​-4H-​1-​benzopyran-​4-​one (3c)	51	8.53333	85.6667	33	44.55		296.333	350	381	342.444		7.68674	5.81046		17.2542	11.3931
		72	3-​(4-​methyl-​1-​piperazinyl)​-4H-​1-​benzopyran-​4-​one (4a)	>400	>400	350	>400	>388		>400	>400	>400	>400		><1.0	><1.0		><0.3	><0.3
		73	6-​methoxy-​3-​(4-​methyl-​1-​piperazinyl)​-4H-​1-​benzopyran-​4-​one (4b)	>400	>400	>400	>400	>400		>400	>400	>400	>400		><1.0	><1.0		><0.3	><0.3
		74	7-​methoxy-​3-​(4-​methyl-​1-​piperazinyl)​-4H-​1-​benzopyran-​4-​one (4c)	360	324	267.333	260	302.833		>400	>400	>400	>400		>1.3	>1.1		>0.4	>0.3
		75	3-​(4-​morpholinyl)​-4H-​1-​benzopyran-​4-​one (5a)	>400	>400	>400	>400	>400		>400	>400	>400	>400		><1.0	><1.0		><0.3	><0.3
		76	6-​methoxy-​3-​(4-​morpholinyl)​-4H-​1-​benzopyran-​4-​one (5b)	>400	>400	>400	>400	>400		>400	>400	>400	>400		><1.0	><1.0		><0.3	><0.3
		77	7-​methoxy-​3-​(4-​morpholinyl)​-4H-​1-​benzopyran-​4-​one (5c)	318	>400	389	>400	>377		>400	>400	>400	>400		><1.1	>1.3		><0.3	>0.4
	2-Azolylchromones (E)	78	2-​(1H-​pyrrol-​1-​yl)​-4H-​1-​benzopyran-​4-​one (1a)	167	352			259.5		274	228.333		251.167		0.967887	1.64072		0.372981	0.982466	40
		79	7-methoxy-2-​(1H-​pyrrol-​1-​yl)​-4H-​1-​benzopyran-​4-​one (1b)	135.667	183.667			159.667		354.333	223		288.667		1.80793	2.61179		1.13232	1.92515
		80	6-methoxy-2-​(1H-​pyrrol-​1-​yl)​-4H-​1-​benzopyran-​4-​one (1c)	190.667	>400			>295		276	230.667		253.333		<0.9	1.44755		<0.3	0.759206
		81	2-​(1H-pyrazol-​1-​yl)​-4H-​1-​benzopyran-​4-​one (2a)	>400	>400			>400		>400	>400		>400		><1.0	><1.0		><0.3	><0.3
		82	7-methoxy-2-​(1H-​pyrazol-​1-​yl)​-4H-​1-​benzopyran-​4-​one (2b)	185	>400			>293		318.667	281.667		300.167		<1.0	1.72252		<0.4	0.931093
		83	6-methoxy-2-​(1H-​pyrazol-​1-​yl)​-4H-​1-​benzopyran-​4-​one (2c)	>360	>400			>380		>400	>364		>382		><1.0	><1.1		><0.3	><0.3
		84	2-​(1H-imidazol-​1-​yl)​-4H-​1-​benzopyran-​4-​one (3a)	63.7333	78.1667			70.95		>400	>373		>387		>5.4	>6.3		>7.7	>9.8
		85	2-​(1H-​imidazol-​1-​yl)​-7-methoxy-4H-​1-​benzopyran-​4-​one (3b)	>400	>400			>400		>400	>400		>400		><1.0	><1.0		><0.3	><0.3
		86	2-​(1H-imidazol-​1-​yl)​-6-methoxy-4H-​1-​benzopyran-​4-​one (3c)	>400	>400			>400		>400	129.333		>265		><0.7	><1.0		><0.2	><0.3
		87	2-​(1H-​1,​2,​4-​triazol-​1-​yl)​-4H-​1-​benzopyran-​4-​one (4a)	130	177			153.5		>367	142		>254		>1.7	>2.8		>1.1	>2.2
		88	7-​methoxy-​2-​(1H-​1,​2,​4-​triazol-​1-​yl)​-4H-​1-​benzopyran-​4-​one (4b)	80.6667	130.667			105.667		>397	74.8667		>236		>2.2	>4.9		>2.1	>6.1
		89	6-methoxy-​2-​(1H-​1,​2,​4-​triazol-​1-​yl)​-4H-​1-​benzopyran-​4-​one (4c)	88.5333	>400			>244		>400	46.7333		>223		><0.9	>4.5		><0.4	>5.1
		90	2-(1H-​1,​2,​3-triazol-​1-​yl)​-4H-​1-​benzopyran-​4-​one (5a)	31.4667	68.5667			50.0167		103.8	>400		>252		>5.0	3.29873		>10.1	10.4832
		91	7-​methoxy-​2-​(1H-​1,​2,​3-​triazol-​1-​yl)​-4H-​1-​benzopyran-​4-​one (5b)	29.1667	80.2333			54.7		103.8	>396		>250		>4.6	3.55886		>8.4	12.2018
		92	6-​methoxy-​2-​(1H-​1,​2,​3-​triazol-​1-​yl)​-4H-​1-​benzopyran-​4-​one (5c)	23.2667	69.9			46.5833		74.1	>360		>217		>4.7	3.18481		>10.0	13.6883
		93	2-​(1H-​indol-​1-​yl)​-​4H-​1-​benzopyran-​4-​one (6a)	6.86667	5.33333			6.1		57.1333	>400		>229		>37.5	8.32039		>614.3	121.171
		94	2-​(1H-indol-​1-​yl)​-7-​methoxy-​4H-​1-​benzopyran-​4-​one (6b)	6.5	6.1			6.3		265	40.2667		152.633		24.2275	40.7692		384.564	627.219
		95	2-​(1H-​indol-​1-​yl)​-6-​methoxy-​4H-​1-​benzopyran-​4-​one (6c)	1.63333	1.33333			1.48333		35.9333	35.4667		35.7		24.0674	22		1622.52	1346.94
		96	2-​(1H-indazol-​1-​yl)​-​4H-​1-​benzopyran-​4-​one (7a)	33.2333	68.7667			51		>400	>400		>400		>7.8	>12.0		>15.4	>36.2
		97	2-​(1H-​indazol-​1-​yl)​-7-​methoxy-​4H-​1-​benzopyran-​4-​one (7b)	76.3	68.0667			72.1833		>400	>369		>385		>5.3	>5.2		>7.4	>6.9
		98	2-​(1H-​indazol-​1-​yl)​-6-​methoxy-​4H-​1-​benzopyran-​4-​one (7c)	>400	28.0667			>214		>400	63.5667		>232		><1.1	><1.0		><0.5	><0.3
		99	2-​(1H-​benzimidazol-​1-​yl)​-4H-​1-​benzopyran-​4-​one (8a)	85.5667	64.1333			74.85		362.667	164.6		263.633		3.52216	4.23841		4.70562	4.95334
		100	2-​(1H-​benzimidazol-​1-​yl)​-7-​methoxy-​4H-​1-​benzopyran-​4-​one (8b)	23.0333	22.3			22.6667		>400	28.9		>214		>9.5	>17.4		>41.7	>75.4
		101	2-​(1H-​benzimidazol-​1-​yl)​-6-​methoxy-​4H-​1-​benzopyran-​4-​one (8c)	5.96667	3.5			4.73333		75	47.6667		61.3333		12.9577	12.5698		273.755	210.668
	2-Azolylchromones (E)	102	2-​(3-​phenyl-​1H-​pyrazol-​1-​yl)​-4H-​1-​benzopyran-​4-​one (1)	18.2	7.35333	15.2333	18.4	14.7967		56.2667	29.6333	9.62333	31.8411		2.15191	3.09158		14.5432	16.9867	41
		103	2-​[3-​(2-​pyridinyl)​-​1H-​pyrazol-​1-​yl]​-4H-​1-​benzopyran-​4-​one (2)	400	400	400	400	400		400	400	246.2	348.733		0.871833	1		0.217958	0.25
		104	6-methoxy-2-​[3-​(2-​pyridinyl)​-​1H-​pyrazol-​1-​yl]​-4H-​1-​benzopyran-​4-​one (3)	400	400	400	400	400		400	400	400	400		1	1		0.25	0.25
		105	7-methoxy-2-​[3-​(2-​pyridinyl)​-​1H-​pyrazol-​1-​yl]​-4H-​1-​benzopyran-​4-​one (4)	400	321	205.333	121	261.833		400	400	400	400		1.52769	1		0.583459	0.25
		106	2-​(4-​phenyl-​1H-​imidazol-​1-​yl)​-4H-​1-​benzopyran-​4-​one (5)	8.43333	4.03833	7.26667	6.42	6.53958		19.5	26.9667	20.3667	22.2778		3.40661	2.31225		52.0921	27.418
		107	2-​[4-​(4-​fluorophenyl)​-​1H-​imidazol-​1-​yl]​-4H-​1-​benzopyran-​4-​one (6)	16.0667	11.63	22.25	23.6	18.3867		366.667	400	400	388.889		21.1506	22.8216		115.032	142.043
		108	2-​[4-​(4-​chlorophenyl)​-​1H-​imidazol-​1-​yl]​-4H-​1-​benzopyran-​4-​one (7)	37.3333	34.8667	272	400	186.05		400	400	400	400		2.14996	10.7143		1.15558	28.699
		109	2-​(4,5-di​phenyl-​1H-​imidazol-​1-​yl)​-4H-​1-​benzopyran-​4-​one (8)	17.8	10.1333	21.4667	22.7333	18.0333		39.3333	65.3333	400	168.222		9.3284	2.20974		51.7287	12.4143
		110	2-​(1H-​1,​2,​4-​triazol-​1-​yl)​-4H-​1-​benzopyran-​4-​one (9)	151	128.333	145.333	238.333	165.75		273.333	375.667	364	337.667		2.0372	1.81015		1.22908	1.19878
		111	6-methoxy-2-​(1H-​1,​2,​4-​triazol-​1-​yl)​-4H-​1-​benzopyran-​4-​one (10)	149.667	111.333	167.667	105.333	133.5		362.333	332.667	358.667	351.222		2.63088	2.42094		1.9707	1.61755
		112	7-methoxy-2-​(1H-​1,​2,​4-​triazol-​1-​yl)​-4H-​1-​benzopyran-​4-​one (11)	364	245	286.667	307	300.667		400	370.333	392	387		1.3	1.1		0.4	0.3
		113	6-chloro-2-​(1H-​1,​2,​4-​triazol-​1-​yl)​-4H-​1-​benzopyran-​4-​one (12)	57.8333	52.2333	84.8667	66.6667	65.4		134	212	171.667	172.556		2.63846	2.317		4.03435	4.00635
		114	2-​(3-methyl-1H-​1,​2,​4-​triazol-​1-​yl)​-4H-​1-​benzopyran-​4-​one (13)	400	400	400	395	399		400	400	366	389		1	1		0.2	0.3
		115	6-methoxy-2-​(3-methyl-1H-​1,​2,​4-​triazol-​1-​yl)​-4H-​1-​benzopyran-​4-​one (14)	400	400	371	343	379		25.1	400	387	271		0.7	0.1		0.2	0.02
		116	7-methoxy-2-​(3-methyl-1H-​1,​2,​4-​triazol-​1-​yl)​-4H-​1-​benzopyran-​4-​one (15)	213.8	166	147	299.667	206.617		14.6333	167.333	174.667	118.878		0.575354	0.068444		0.278465	0.0320131
		117	6-chloro-2-​(3-methyl-1H-​1,​2,​4-​triazol-​1-​yl)​-4H-​1-​benzopyran-​4-​one (16)	322.333	400	291	317.667	333		400	374.667	355.667	377		1.1	1.2		0.3	0.4
		118	2-​(3,5-dimethyl-1H-​1,​2,​4-​triazol-​1-​yl)​-4H-​1-​benzopyran-​4-​one (17)	262.333	230.333	274.667	332	274.833		348.667	400	400	383		1.4	1.3291		0.5	0.506645
		119	2-​(3,5-dimethyl-1H-​1,​2,​4-​triazol-​1-​yl)​-6-methoxy-4H-​1-​benzopyran-​4-​one (18)	271.667	187.667	145.667	266.667	217.917		400	400	400	400		1.8	1.47239		0.8	0.541985
		120	2-​(3,5-dimethyl-1H-​1,​2,​4-​triazol-​1-​yl)​-7-methoxy-4H-​1-​benzopyran-​4-​one (19)	150.667	148.667	152.333	161	153.167		190.333	397	355.333	314.333		2.05223	1.26327		1.33987	0.838456
		121	6-chloro-2-​(3,5-dimethyl-1H-​1,​2,​4-​triazol-​1-​yl)​-4H-​1-​benzopyran-​4-​one (20)	131	142.333	129.667	206	152.25		280.333	400	377	352.444		2.31491	2.13995		1.52046	1.63355
	3-Benzylidenechromones (F)	122	(3E)-2,3-dihydro-3-(phenylmethylene)-4H-1-benzopyran-4-one (1)	7.63333	11.1667			9.4		75.6667		77	76.3333		8.12057	9.91266		86.389	129.86	42
		123	(3E)-2,3-dihydro-3-[(4-hydroxyphenyl)methylene]-4H-1-benzopyran-4-one (2)	24.1667	32.3333			28.25		344.667		>400	372.333		13.1799	14.2621		46.6547	59.0155
		124	(3E)-2,3-dihydro-3-[(3,4-dihydroxyphenyl)methylene]-4H-1-benzopyran-4-one (3)	9.93333	17.3333			13.6333		210.667		>400	>305.3		22.3936	21.2081		164.257	213.504
		125	(3E)-2,3-dihydro-3-[(4-methoxyphenyl)methylene]-4H-1-benzopyran-4-one (4)	8.76667	21.3333			15.05		70.6667		190.333	130.5		8.6711	8.06084		57.6153	91.9487
		126	(3E)-2,3-dihydro-3-[(3,4-dimethoxyphenyl)methylene]-4H-1-benzopyran-4-one (5)	7.7	7.96667			7.83333		70.6667		69	69.8333		8.91489	9.17749		113.807	119.188
		127	(3E)-2,3-dihydro-3-[(4-dimethylaminophenyl)methylene]-4H-1-benzopyran-4-one (6)	18.4333	21			19.7167		>400		>400	>400		20.2874	21.6998		102.895	117.721
		128	(3E)-2,3-dihydro-3-[(4-fluorophenyl)methylene]-4H-1-benzopyran-4-one (7)	7.6	8.96667			8.28333		140		107.333	123.667		14.9296	18.4211		180.236	242.382
		129	(3E)-3-[(4-chlorophenyl)methylene]-2,3-dihydro-4H-1-benzopyran-4-one (8)	10.2333	17.6667			13.95		>400		383.667	>391.8		28.086	39.0879		201.333	381.967
		130	(3E)-2,3-dihydro-7-hydroxy-3-[(4-hydroxyphenyl)methylene]-4H-1-benzopyran-4-one (9)	24.6667	29.6667			27.1667		205.333		192.667	199		7.32515	8.32432		26.9638	33.7473
		131	(3E)-2,3-dihydro-3-[(3,4-dihydroxyphenyl)methylene]-7-hydroxy-4H-1-benzopyran-4-one (10)	16.5	16.5667			16.5333		>400		>400	>400		24.1935	24.2424		146.332	146.924
		132	(3E)-2,3-dihydro-7-hydroxy-3-[(4-methoxyphenyl)methylene]-4H-1-benzopyran-4-one (11)	23.6667	27.3333			25.5		138.667		207.333	173		6.78431	5.85915		26.6052	24.757
		133	(3E)-2,3-dihydro-3-[(4-dimethylaminophenyl)methylene]-7-hydroxy-4H-1-benzopyran-4-one (12)	5.13333	4.46667			4.8		33		306.667	169.833		35.3819	6.42857		737.124	125.232
		134	(3E)-2,3-dihydro-7-methoxy-3-(phenylmethylene)-4H-1-benzopyran-4-one (13)	7.63333	13.6667			10.65		85.3333		92	88.6667		8.32551	11.179		78.1738	146.45
		135	(3E)-2,3-dihydro-3-[(4-hydroxyphenyl)methylene]-7-methoxy-4H-1-benzopyran-4-one (14)	24.1667	27			25.5833		143.333		172.667	158		6.1759	5.93103		24.1403	24.5422
		136	(3E)-2,3-dihydro-3-[(3,4-dihydroxyphenyl)methylene]-7-methoxy-4H-1-benzopyran-4-one (15)	3.16667	11.3333			7.25		>400		>400	>400		55.1724	126.316		760.999	3988.92
		137	(3E)-2,3-dihydro-7-methoxy-3-[(4-methoxyphenyl)methylene]-4H-1-benzopyran-4-one (16)	7.2	16			11.6		>400		116	>258.0		22.2414	55.5556		191.736	771.605
		138	(3E)-2,3-dihydro-3-[(4-dimethylaminophenyl)methylene]-7-methoxy-4H-1-benzopyran-4-one (17)	254.667	>400			>327		>400		>400	>400		1.22324	1.57068		0.37408	0.616759
	Pyrano[4,3-b]chromones (G)	139	3-ethoxy-​4,4a-​dihydro-3H,10H-​pyrano[4,3-​b]​[1]​benzopyran-​10-​one (1)	193.667	369.333					>400	>400				>1.4	>2.1		>0.5	>1.1	43
		140	3-​butoxy-​4,4a-​dihydro-3H,10H-​pyrano[4,3-​b]​[1]​benzopyran-​10-one (2)	104.667	186.667					>400	>387				>2.7	>3.8		>1.9	>3.7
		141	4,4a-​dihydro-​3-​methoxy-​3-​methyl-​3H,10H-​pyrano[4,3-​b]​[1]​benzopyran-​10-one (3)	28	31.9333					245	270				8.58732	8.7381		28.6562	31.2075
		142	8-chloro-3-ethoxy-​4,4a-​dihydro-3H,10H-​pyrano[4,3-​b]​[1]​benzopyran-​10-one (4)	313.333	>400					>400	>400				><1.1	>1.3		><0.3	>0.4
		143	3-​butoxy-​8-chloro-4,4a-​dihydro-3H,10H-pyrano[4,3-​b]​[1]​benzopyran-​10-one (5)	74.2	236.667					>400	>400				>2.6	>5.4		>1.7	>7.3
		144	8-chloro-4,4a-​dihydro-​3-​methoxy-​3-​methyl-​3H,​10H-​pyrano[4,​3-​b]​[1]​benzopyran-​10-one (6)	32.7667	40.6333					142	192.333				4.55495	4.33367		12.4113	13.2259
		145	3-ethoxy-​4,4a-​dihydro-8-methoxy-3H,10H-pyrano[4,3-​b]​[1]​benzopyran-​10-one (7)	142	174.667					>400	>398				>2.5	>2.8		>1.6	>2.0
		146	3-​butoxy-​4,4a-​dihydro-8-methoxy-3H,10H-​pyrano[4,3-​b]​[1]​benzopyran-​10-one (8)	84.1667	221					>391	>400				>2.6	>4.6		>1.7	>5.5
		147	4,4a-​dihydro-​3,8-​dimethoxy-​3-​methyl-​3H,10H-​pyrano[4,3-​b]​[1]​benzopyran-​10-one (9)	12.4	14.8					87.7667	103				7.01348	7.07796		51.5697	57.0803
		148	2,3,12a,12b-​tetrahydro-1H,4aH,​7H-​pyrano[3',​2':5,​6]​pyrano[4,​3-​b]​[1]​benzopyran-​7-one (10)	68.2333	95.4					347.333	246				3.62599	5.09038		4.43185	7.46025
		149	(11): Diasteromer of (1)	103	114.933					339.667	273.333				2.81279	3.29773		2.58133	3.20168
		150	(12): Diasteromer of (2)	41.7333	75.2					288	243.667				4.54675	6.90096		7.77665	16.5358
		151	(13): Diasteromer of (3)	15.6	23.8333					175.333	125				7.61623	11.2393		38.6284	72.0469
		152	(14): Diasteromer of (4)	52.0333	93.4					294.333	146.333				3.03003	5.65663		4.16689	10.8712
		153	(15): Diasteromer of (5)	21.4667	42.7667					182	240				6.5698	8.47826		20.456	39.495
		154	(16): Diasteromer of (6)	4.7	5.33333					247	232.667				47.8073	52.5532		952.97	1118.15
		155	(17): Diasteromer of (7)	11.0667	13.9					>386	317.667				>28.2	>34.9		>225.9	>315.4
		156	(18): Diasteromer of (8)	34.7667	76.2667					315.667	285				5.40979	9.07958		9.74444	26.1158
		157	(19): Diasteromer of (9)	14.9	15.1667					141.667	117				8.6031	9.50783		57.2269	63.8109
		158	(20): Diasteromer of (10)	136.667	267.333					>397	391				>1.9	>2.9		>1.0	>2.1
	Furo[2,3-b]chromones (H)	159	(3aR,9aR)-rac-3a,9a-dihydro-2,2-dimethyl-4-oxo-4H-furo[2,3-b][1]benzopyran-3,3(2H)-dicarboxylic acid 3,3-dimethyl ester (1a)	400	400	400	400			400	400	400	400		1	1		0.25	0.25	44
		160	(3aR,9aR)-rac-3a,9a-dihydro-7-methoxy-2,2-dimethyl-4-oxo-4H-furo[2,3-b][1]benzopyran-3,3(2H)-dicarboxylic acid 3,3-dimethyl ester (1b)	400	400	400	400			400	400	400	400		1	1		0.25	0.25
		161	(3aR,9aR)-rac-3'a,9'a-dihydro-4'-oxo-spiro[cyclopentane-1,2'(3'H)-[4H]furo[2,3-b][1]benzopyran]-3',3'-dicarboxylic acid 3',3'-dimethyl ester (2a)	400	400	400	400			400	400	400	400		1	1		0.25	0.25
		162	(3aR,9aR)-rac-3'a,9'a-dihydro-7-methoxy-4'-oxo-spiro[cyclopentane-1,2'(3'H)-[4H]furo[2,3-b][1]benzopyran]-3',3'-dicarboxylic acid 3',3'-dimethyl ester (2b)	400	400	400	400			400	400	400	400		1	1		0.25	0.25
		163	(3aR,9aR)-rac-3'a,9'a-dihydro-4'-oxo-spiro[cyclohexane-1,2'(3'H)-[4H]furo[2,3-b][1]benzopyran]-3',3'-dicarboxylic acid 3',3'-dimethyl ester (3a)	369	400	400	389.667			393.667	400	400	397.889		1.0211	1.06685		0.262045	0.289119
		164	(3aR,9aR)-rac-3'a,9'a-dihydro-7-methoxy-4'-oxo-spiro[cyclohexane-1,2'(3'H)-[4H]furo[2,3-b][1]benzopyran]-3',3'-dicarboxylic acid 3',3'-dimethyl ester (3b)	307.667	303	264.667	291.778			347.667	400	400	382.556		1.31112	1.13001		0.449356	0.367284
		165	(2R,3aR,9aR)-rac-3a,9a-dihydro-4-oxo-2-phenyl-4H-furo[2,3-b][1]benzopyran-3,3(2H)-dicarboxylic acid 3,3-dimethyl ester (4a)	400	400	400	400			398	400	400	399.333		0.998333	0.995		0.249583	0.24875
		166	(2R,3aR,9aR)-rac-3a,9a-dihydro-7-methoxy-4-oxo-2-phenyl-4H-furo[2,3-b][1]benzopyran-3,3(2H)-dicarboxylic acid 3,3-dimethyl ester (4b)	363.333	400	400	387.778			400	400	400	400		1.03152	1.10092		0.266008	0.303005
		167	(2R,3aR,9aR)-rac-3a,9a-dihydro-4-oxo-2-(2-phenylethenyl)-4H-furo[2,3-b][1]benzopyran-3,3(2H)-dicarboxylic acid 3,3-dimethyl ester (5a)	14.1333	27.0667	81.6333	40.9444			141.333	155.667	147.333	148.111		3.61737	10		8.83482	70.7547
		168	(2R,3aR,9aR)-rac-3a,9a-dihydro-7-methoxy-4-oxo-2-(2-phenylethenyl)-4H-furo[2,3-b][1]benzopyran-3,3(2H)-dicarboxylic acid 3,3-dimethyl ester (5b)	13.75	27.7	70.0667	37.1722			185.333	273.333	324	260.889		7.01838	13.4788		18.8807	98.0275
		169	(2R,3aR,9aR)-rac-3a,9a-dihydro-4-oxo-2-(1-propen-1-yl)-4H-furo[2,3-b][1]benzopyran-3,3(2H)-dicarboxylic acid 3,3-dimethyl ester (6a)	19.7	62.1	66.1	49.3			142.667	282.667	294.667	240		4.86815	7.24196		9.87455	36.7612
		170	(2R,3aR,9aR)-rac-3a,9a-dihydro-7-methoxy-4-oxo-2-(1-propen-1-yl)-4H-furo[2,3-b][1]benzopyran-3,3(2H)-dicarboxylic acid 3,3-dimethyl ester (6b)	16.3	50.1333	54.4667	40.3			141	269.333	329.667	246.667		6.12076	8.65031		15.188	53.0694
	3-Styrylchromenes (I)	171	(E)-3-styryl-2H-chromene (1)	284.333	30.6667	61.3333	8.925	96.3146		400	400	400	400		4.15306	1.4068		4.31197	0.494771	45
		172	(E)-3-(4-methoxystyryl)-2H-chromene (2)	73	11.2667	27	6.325	29.3979		121.333	60	400	193.778		6.59155	1.6621		22.4218	2.27685
		173	(E)-3-(4-fluorostyryl)-2H-chromene (3)	68.6667	58	39.6667	8.25	43.6458		232.333	53	400	228.444		5.23405	3.3835		11.9921	4.92742
		174	(E)-3-(4-chlorostyryl)-2H-chromene (4)	31	8.56667	7.7	3.28	12.6367		67	19.6667	400	162.222		12.8374	2.16129		101.589	6.9719
		175	(E)-6-methoxy-3-styryl-2H-chromene (5)	271.333	21.6667	5.7	9.3	77		62	59.3333	191	104.111		1.35209	0.228501		1.75596	0.0842142
		176	(E)-6-methoxy-3-(4-methoxystyryl)-2H-chromene (6)	10.5	3.03333	2.9	3.73	5.04083		72	3.66667	309	128.222		25.4367	6.85714		504.613	65.3061
		177	(E)-3-(4-fluorostyryl)-6-methoxy-2H-chromene (7)	17.2333	12.3333	21	8.1	14.6667		59.6667	24.6667	203.333	95.8889		6.53788	3.46228		44.5764	20.0906
		178	(E)-3-(4-chlorostyryl)-6-methoxy-2H-chromene (8)	22.6667	11.8667	32	8.715	18.8121		50.3333	65.6667	400	172		9.14306	2.22059		48.6021	9.79671
		179	(E)-7-methoxy-3-styryl-2H-chromene (9)	11.4	17.6667	19.6667	10.55	14.8208		400	27	400	275.667		18.5999	35.0877		125.499	307.787
		180	(E)-7-methoxy-3-(4-methoxystyryl)-2H-chromene (10)	9.53333	8.76667	9.1	6.075	8.36875		324.333	272	400	332.111		39.6847	34.021		474.201	356.863
		181	(E)-3-(4-fluorostyryl)-7-methoxy-2H-chromene (11)	8.96667	10.5	10.5667	8.525	9.63958		142.667	35	400	192.556		19.9755	15.9108		207.224	177.444
		182	(E)-3-(4-cholorostyryl)-7-methoxy-2H-chromene (12)	3.46667	1.53333	5.46667	8.275	4.68542		400	41.3333	400	280.444		59.8548	115.385		1277.47	3328.4
		183	(E)-6-chloro-3-styryl-2H-chromene (13)	17.1333	2.26667	9.46667	8.675	9.38542		175	57.6667	400	210.889		22.4698	10.214		239.412	59.6148
		184	(E)-6-chloro-3-(4-methoxystyryl)-2H-chromene (14)	4.53333	2.56667	6.3	5.95	4.8375		110	59.6667	400	189.889		39.2535	24.2647		811.442	535.251
		185	(E)-6-chloro-3-(4-fluorostyryl)-2H-chromene (15)	21	9.56667	10.5667	8.05	12.2958		97.3333	12.6667	400	170		13.8258	4.63492		112.443	22.0711
		186	(E)-6-chloro-3-(4-chlorostyryl)-2H-chromene (16)	34.6667	3.50333	8.13333	9.3	13.9008		400	58.5	400	286.167		20.5863	11.5385		148.094	33.284
	3-Flavens (J)	187	2-​phenyl-2H-​1-​benzopyran (1)	79	95.3333	72	60.3333	76.6667		166.333	216.667	176.667	186.556		2.43333	2.10549		3.17391	2.66517
	(unpublished)	188	2-​(4-​methoxyphenyl)​-2H-​1-​benzopyran (2)	72.3333	118.333	101.667	35.3333	81.9167		255	266.333	159.667	227		2.77111	3.52535		3.38284	4.87375
		189	2-​(3,4-​dimethoxyphenyl)​-2H-​1-​benzopyran (3)	115.667	103	88.6667	17	81.0833		236.667	287	184.333	236		2.91059	2.04611		3.58962	1.76897
		190	2-​(4-fluorophenyl)​-2H-​1-​benzopyran (4)	62	83.3333	71.6667	51.3333	67.0833		197.667	243	117.667	186.111		2.77433	3.18817		4.13564	5.14221
		191	2-​(4-chlorophenyl)​-2H-​1-​benzopyran (5)	82.6667	94	88.6667	64.3333	82.4167		177.667	234	215.333	209		2.53589	2.14919		3.07692	2.59983
		192	2-​(4-bromophenyl)​-2H-​1-​benzopyran (6)	47.6667	87.6667	83.6667	52.3333	67.8333		139	156	148.333	147.778		2.17854	2.91608		3.21161	6.11766
		193	7-​methoxy-​2-​phenyl​-2H-​1-benzopyran (7)	72.3333	81.3333	74	56.3333	71		163.667	264	224	217.222		3.05947	2.26267		4.30911	3.12812
		194	7-​methoxy-​2-​(4-​methoxyphenyl)​-2H-​1-benzopyran (8)	51.6667	89.6667	82.3333	69.3333	73.25		384	363.667	295	347.556		4.74479	7.43226		6.47752	14.385
		195	2-​(3,4-​dimethoxyphenyl)​-7-​methoxy-​2H-​1-​benzopyran (9)	73.6667	44.6667	38	46	50.5833		172.667	174.333	97.6667	148.222		2.93026	2.34389		5.79293	3.18175
		196	2-​(4-bromophenyl)​-7-​methoxy-​2H-​1-​benzopyran (10)	98.6667	83.6667	73.3333	68.6667	81.0833		321	340.333	310	323.778		3.99315	3.25338		4.92475	3.29734
	Aurones (K)	197	(2Z)​-2-​(phenylmethylene)-​3(2H)​-​benzofuranone (1)	43.0333	56.0667		16.5	38.5333		75.1667	70.2	23.6667	56.3444		1.46223	1.74671		3.7947	4.05897	46
		198	(2Z)​-2-​[(4-​methoxyphenyl)​methylene]​-​3(2H)​-​benzofuranone (2)	35.5667	41.9		14.8	30.7556		305.667	255.633	48.4433	203.248		6.60849	8.59419		21.4871	24.1636
		199	(2Z)​-2-​[(3,4-​dimethoxyphenyl)​methylene]​-​3(2H)​-​benzofuranone (3)	183	>354		78	>205		266	290	304.333	286.778		<1.4	1.45355		<0.7	0.794291
		200	(2Z)​-2-​[(4-​fluorophenyl)​methylene]​-​3(2H)​-​benzofuranone (4)	119.9	85.6667		6.97667	70.8478		138.967	276.333	23.7	146.333		2.06546	1.15902		2.91535	0.966657
		201	(2Z)​-2-​[(4-​chlorophenyl)​methylene]​-​3(2H)​-​benzofuranone (5)	33.8667	42.2333		11.3	29.1333		86.9667	76.2667	10.71	57.9811		1.9902	2.56791		6.83134	7.58242
		202	(2Z)​-2-​[(4-bromophenyl)​methylene]​-​3(2H)​-​benzofuranone (6)	41.5	47.8667		7.92667	32.4311		33.8	33.1333	5.9	24.2778		0.748595	0.814458		2.30826	1.96255
		203	(2Z)​-2-​[(4-​hydroxyphenyl)​methylene]​-​3(2H)​-​benzofuranone (7)	36.5	57.2333		30.5333	41.4222		>400	>400	>400	>400		>9.7	>11.0		>23.3	>30.0
		204	(2Z)​-6-methoxy-2-​(phenylmethylene)-​3(2H)​-​benzofuranone (8)	37.8333	74.9333		45.1	52.6222		88.8333	99.2	130.467	106.167		2.01753	2.34802		3.83398	6.20621
		205	(2Z)​-6-methoxy-2-​[(4-​methoxyphenyl)​methylene]​-​3(2H)​-​benzofuranone (9)	40.2	73.2667		41.5333	51.6667		236.667	48.1333	205	163.267		3.16	5.88723		6.11613	14.6449
		206	(2Z)​-2-​[(3,4-​dimethoxyphenyl)​methylene]​-​6-methoxy-3(2H)​-​benzofuranone (10)	44.3333	315.667		56.9333	138.978		334	339.333	314.667	329.333		2.36968	7.53383		1.70508	16.9936
		207	(2Z)​-2-​[(4-​bromophenyl)​methylene]​-6-methoxy-​3(2H)​-​benzofuranone (11)	33.9333	70.3		23.8667	42.7		197.333	165	147	169.778		3.97606	5.81532		9.31162	17.1375
		208	(2Z)​-2-​[(3,4-​dimethoxyphenyl)​methylene]​-​6-hydroxy-3(2H)​-​benzofuranone (12)	140	>385		300	>275		>360	324	>381	>355		><1.3	>2.6		><0.5	>1.8
		209	(2Z)​-2-​[(4-​fluorophenyl)​methylene]-6-hydroxy​-​3(2H)​-​benzofuranone (13)	47.3667	59.4		66.3667	57.7111		143.333	108.9	88.5333	113.589		1.96823	3.02604		3.41049	6.38854
		210	(2Z)​-2-​[(4-​chlorophenyl)​methylene]-6-hydroxy​-​3(2H)​-​benzofuranone (14)	37.2667	41.3333		41	39.8667		113.467	106.9	94.8333	105.067		2.63545	3.04472		6.61066	8.1701
		211	(2Z)​-2-​[(4-​bromophenyl)​methylene]-6-hydroxy​-​3(2H)​-​benzofuranone (15)	38.7333	48.1		48.8667	45.2333		154.333	123.067	105.3	127.567		2.82019	3.98451		6.23476	10.287
		212	(2Z)​-6-hydroxy-2-​[(4-​hydroxyphenyl)​methylene]​-​3(2H)​-​benzofuranone (16)	182.667	>390		251	>275		303	>337	>386	>342		><1.2	1.65876		>0.5	0.90808
		213	(2Z)​-2-​[(3,4-​dihydroxyphenyl)​methylene]-6-hydroxy​-​3(2H)​-​benzofuranone (17)	287.667	186.667		31.4667	168.6		>392	>400	>356	>382		>2.3	>1.4		>1.3	>0.5
	Chalcones (L)	214	(2E)-1-(2-Hydroxyphenyl)-3-phenyl-2-propen-1-one (1)	18.15	28.6	19.2	33.15	24.775		41.5	71.95	71.8	61.75		2.49243	2.2865		10.0603	12.5978	47
		215	(2E)-1-(2-hydroxyphenyl)-3-(4-hydroxyphenyl)-2-propen-1-one (2)	31.15	53	29.35	51	41.125		115.5	281.5	167	188		4.57143	3.70787		11.1159	11.9033
		216	(2E)-1-(2-hydroxyphenyl)-3-(4-methoxyphenyl)-2-propen-1-one (3)	21.7	36.15	21	41.95	30.2		56.5	145	69.5	90.3333		2.99117	2.60369		9.90454	11.9986
		217	(2E)-3-(3,4-dimethoxyphenyl)-1-(2-hydroxyphenyl)-2-propen-1-one (4)	24.2	45.65	26	41.05	34.225		83	153.5	112.05	116.183		3.39469	3.42975		9.91875	14.1725
		218	(2E)-3-(4-fluorophenyl)-1-(2-hydroxyphenyl)-2-propen-1-one (5)	15.05	22.2	13.35	26.55	19.2875		34.7	69.3	46.15	50.05		2.59494	2.30565		13.454	15.3199
		219	(2E)-3-(4-chlorophenyl)-1-(2-hydroxyphenyl)-2-propen-1-one (6)	8.65	13.15	10.06	16.35	12.0525		21.1	35	30.15	28.75		2.3854	2.43931		19.7917	28.2001
		220	(2E)-3-(4-bromophenyl)-1-(2-hydroxyphenyl)-2-propen-1-one (7)	9.45	9.985	9.91	14.25	10.8987		22.8	47	36.55	35.45		3.25267	2.4127		29.8444	25.5312
		221	(2E)-1-(2-hydroxy-4-methoxyphenyl)-3-(4-hydroxyphenyl)-2-propen-1-one (8)	29.55	32.65	27.75	44.6	33.6375		73.7	151	153	125.9		3.74285	2.49408		11.127	8.4402
		222	(2E)-1-(2-hydroxy-4-methoxyphenyl)-3-phenyl-2-propen-1-one (9)	9.75	11.2	10.685	20.5	13.0337		31.55	51.8	55.25	46.2		3.54464	3.2359		27.1959	33.1887
		223	(2E)-1-(2-hydroxy-4-methoxyphenyl)-3-(4-methoxyphenyl)-2-propen-1-one (10)	21.5	23.05	21.55	40.15	26.5625		47.35	234	197.5	159.617		6.0091	2.20233		22.6225	10.2434
		224	(2E)-3-(3,4-dimethoxyphenyl)-1-(2-hydroxy-4-methoxyphenyl)-2-propen-1-one (11)	14.6	20.85	15.4	31.75	20.65		64.4	97.3	73.35	78.35		3.79419	4.41096		18.3738	30.212
		225	(2E)-3-(4-bromophenyl)-1-(2-hydroxy-4-methoxyphenyl)-2-propen-1-one (12)	10.3	11	10.1	19.35	12.6875		38.1	98.45	81.25	72.6		5.72217	3.69903		45.1008	35.9129
		226	(2E)-1-(4-methoxyphenyl)-3-(4-methoxyphenyl)-2-propen-1-one (13)	15.8	21.8	18.9	28.65	21.2875		32.5	51.95	70.4	51.6167		2.42474	2.05696		11.3904	13.0187
		227	(2E)-3-(2,4-dimethoxyphenyl)-1-(4-methoxyphenyl)-2-propen-1-one (14)	15.75	30	17.85	19.75	20.8375		30.7	68.8	70.1	56.5333		2.71306	1.94921		13.0201	12.3759
		228	(2E)-1-(2,4-dimethoxyphenyl)-3-(4-methoxyphenyl)-2-propen-1-one (15)	4.15	6.55	3.91	<3.1	<4.4		23.1	49.95	40.75	37.9333		>8.6	5.56627		>194	134.127
	Cinnamic acid phenethyl esters (M)	229	(2E)​-3-​(​4-​hydroxy-3-methoxyphenyl)​-​2-​propenoic acid 2-​(3,4-​dihydroxyphenyl)​ethyl ester (1)	84.1333	50.1	80.6333	51.6667	66.6333		159	268.667	285	237.556		3.56512	1.88986		5.35035	2.24626	48
		230	(2E)​-3-​(​4-hydroxyphenyl)​-​2-​propenoic acid 2-​(3,4-​dihydroxyphenyl)​ethyl ester (2)	98.0333	33.3333	73.8333	41.6333	61.7083		284	307	321.667	304.222		4.93	2.89697		7.9892	2.95509
		231	(2E)​-3-​(3,​4-dihydroxyphenyl)​-​2-​propenoic acid 2-​(3,4-​dihydroxyphenyl)​ethyl ester (3)	55.5333	12.9333	9.11667	16.5333	23.5292		313.333	373.333	332	339.556		14.4313	5.64226		61.3335	10.1601
		232	(2E)​-3-​(​4-​hydroxy-3-methoxyphenyl)​-​2-​propenoic acid 2-​(4-​hydroxyphenyl)​ethyl ester (4)	91.8333	114.333	104.133	108.867	104.792		130.333	150.333	263	181.222		1.72936	1.41924		1.65028	1.54545
		233	(2E)​-3-​(​4-hydroxyphenyl)​-​2-​propenoic acid 2-​(4-​hydroxyphenyl)​ethyl ester (5)	162	63.8	160.333	157.667	135.95		288	332	355.333	325.111		2.3914	1.77778		1.75903	1.09739
		234	(2E)​-3-​(3,​4-dihydroxyphenyl)​-​2-​propenoic acid 2-​(4-​hydroxyphenyl)​ethyl ester (6)	32	18.1333	24.7667	25.6	25.125		270.667	247.333	236.333	251.444		10.0077	8.45833		39.8318	26.4323
		235	(2E)​-3-​phenyl​-​2-​propenoic acid 2-(4-hydroxy​phenyl)​ethyl ester (7)	157.667	42.0667	76.1	133.667	102.375		218	185	280	227.667		2.22385	1.38266		2.17226	0.876954
		236	(2E)​-3-​(​4-​hydroxyphenyl)​-​2-propenoic acid 2-​phenyl​ethyl ester (8)	54.3667	26.1333	105.867	45.1333	57.875		139	147.333	152.333	146.222		2.52652	2.55671		4.36547	4.70272
		237	(2E)​-3-​(3,​4-​dihydroxyphenyl)​-​2-propenoic acid 2-​phenyl​ethyl ester (9)	13.4	10.6667	4.32667	5.59667	8.4975		153	173.333	269.667	198.667		23.3794	11.4179		275.133	85.2083
		238	(2E)​-3-​phenyl​-​2-propenoic acid 2-​phenyl​ethyl ester (10)	176	105.433	265	240	196.608		>398	>400	>400	>399.3		>2.0	>2.3		>1.0	>1.3
	Piperic acid esters (N)	239	(2E,4E)-5-(3,4-methylenedioxyphenyl)-2,4-pentadienoic acid (4-methoxyphenyl)methyl ester (1)	26.4333	44.4667	40.0667	40.7333	37.925		>400	>400	>400	>400		>10.5	>15.1		>27.8	>57.2	49
		240	(2E,4E)-5-(3,4-methylenedioxyphenyl)-2,4-pentadienoic acid (4-hydroxy-3-methoxyphenyl)methyl ester (2)	270	>400	>400	>400	>368		>400	>375	>393	>390		><1.1	>1.5		><0.3	>0.5
		241	(2E,4E)-5-(3,4-methylenedioxyphenyl)-2,4-pentadienoic acid 2-(4-hydroxyphenyl)ethyl ester (3)	44.8667	67.2333	41.9	29.8667	45.9667		104.667	138.667	121	121.444		2.64201	2.33284		5.74767	5.19949
		242	(2E,4E)-5-(3,4-methylenedioxyphenyl)-2,4-pentadienoic acid 2-(3,4-dihydroxyphenyl)ethyl ester (4)	5.46667	27.6	21.5667	13.3667	17		118.333	151.333	137.667	135.778		7.98693	21.6463		46.9819	395.97
		243	(2E,4E)-5-(3,4-methylenedioxyphenyl)-2,4-pentadienoic acid 2-(4-methoxyphenyl)ethyl ester (5)	29.4	47.9333	48.5333	43.0333	42.225		59	81.4333	68.3667	69.6		1.64831	2.0068		3.90364	6.82586
		244	(2E,4E)-5-(3,4-methylenedioxyphenyl)-2,4-pentadienoic acid 2-(3,4-dimethoxyphenyl)ethyl ester (6)	92.0333	86.9667	101.633	127	101.908		130.433	340	103.333	191.256		1.87674	1.41724		1.8416	1.53992
		245	(2E,4E)-5-(3,4-methylenedioxyphenyl)-2,4-pentadienoic acid 2-phenylethyl ester (7)	60.4	74.8	40.7	67.8333	60.9333		>400	>400	>400	>400		>6.6	>6.6		>10.8	>11.0
		246	(2E,4E)-5-(3,4-methylenedioxyphenyl)-2,4-pentadienoic acid 3-phenylpropyl ester (8)	>400	>400	>400	>400	>400		>400	>400	>400	>400		><1.0	><1.0		><0.3	><0.3
		247	(2E,4E)-5-(3,4-methylenedioxyphenyl)-2,4-pentadienoic acid 4-phenyl-2-butyl ester (9)	>400	>400	>400	>400	>400		>400	>400	>400	>400		><1.0	><1.0		><0.3	><0.3
		248	(2E,4E)-5-(3,4-methylenedioxyphenyl)-2,4-pentadienoic acid 4-phenylbutyl ester (10)	>400	>400	>400	>400	>400		>400	>400	>400	>400		><1.0	><1.0		><0.3	><0.3
		249	(2E,4E)-5-(3,4-methylenedioxyphenyl)-2,4-pentadienoic acid decyl ester (11)	>400	>400	>400	>400	>400		>400	>400	>400	>400		><1.0	><1.0		><0.3	><0.3
	Phenylpronanoid amides (O)	250	N-p-coumaroylvanillylamine (1)	68	155	262	218	176		180	243	255	226		1.3	2.6		0.738636	3.82353	50
		251	N-feruloylvanillylamine (2)	66	229	238	269	201		207	295	257	253		1.3	3.1		0.646766	4.69697
		252	N-caffeoylvanillylamine (3)	79	94	89	227	122		>400	>400	334	378		>3.1	>5.1		>2.5	>6.5
		253	N-p-coumaroyltyramine (4)	21	25	88	53	47		62	65	51	59		1.3	3		2.76596	14.2857
		254	N-feruloyltyramine (5)	222	274	277	299	268		211	220	275	235		0.9	1		0.335821	0.45045
		255	N-caffeoyltyramine (6)	153	45	74	126	100		325	333	>363	>340		>3.4	2.1		>3.4	1.37255
		256	N-p-coumaroyldopamine (7)	261	54	174	83	143		269	212	271	251		1.8	1		1.25874	0.383142
		257	N-feruloyldopamine (8)	>400	87	316	272	268		352	278	320	317		1.2	0.9		0.447761	0.225
		258	N-caffeoyldopamine (9)	361	72	172	221	207		318	306	322	315		1.5	0.9		0.724638	0.249307
		259	N-p-coumaroylserotonin (10)	236	74	122	184	154		111	146	212	156		1	0.5		0.649351	0.211864
		260	N-feruloylserotonin (11)	134	142	139	181	149		164	175	242	194		1.3	1.2		0.872483	0.895522
		261	N-caffeoylserotonin (12)	157	102	139	130	132		117	117	158	131		1	0.7		0.757576	0.44586
	Piperic acid amides (P)	262	1-[5-(1,3-benzodioxol-5-yl)-1-oxo-2,4-pentadienyl]piperidine (1)	128	512	583	600	456		473	513	501	496		1.1	3.6		0.241228	2.8125	51
		263	N-piperoylethanolamine (2)	239	335	487	450	378		539	510	518	522		1.4	2.3		0.37037	0.962343
		264	N-piperoylputrescine (3)	103	114	134	122	118		81	127	137	115		1	0.8		0.847458	0.776699
		265	N-piperoylcadaverine (4)	107	118	170	152	137		122	137	131	130		1	1.1		0.729927	1.02804
		266	N-piperoylphenethylamine (5)	7.4	13	73	199	73		21	68	82	57		0.8	2.8		1.09589	37.8378
		267	N-piperoyl-3-phenylpropylamine (6)	13	18	81	208	80		16	41	19	25		0.3	1.3		0.375	10
		268	N-piperoyltyramine (7)	11	16	18	14	15		13	23	20	19		1.3	1.2		8.66667	10.9091
		269	N-piperoyldopamine (8)	38	51	131	80	75		>800	>800	>800	>800		>10.7	>21.1		>14.3	>55.5
		270	N-piperoylvanillylamine (9)	79	447	97	>800	356		535	535	573	548		<1.5	6.8		<0.4	8.60759
		271	N-piperoylserotonin (10)	33	51	38	58	45		41	46	75	54		1.2	1.2		2.66667	3.63636
		272	N-piperoylhistamine (11)	455	696	>800	500	613		658	617	680	652		<1.1	1.4		<0.2	0.307692
		273	N-piperoyl-2-(2-pyridinyl)ethylamine (12)	183	262	268	250	241		343	497	467	436		1.8	1.9		0.746888	1.03825
	Oleoylamides (Q)	274	oleamide (1)	63.3333	52.6667	63.6667	59	59.6667		88	108.667	65	87.2222		1.46182	1.38947		2.44999	2.19391	52
		275	(Z)-N-(2-hydroxyethyl)-9-octadecenamide (2)	70.6667	46.3333	68.3333	56	60.3333		65.3333	66.3333	37.3333	56.3333		0.933702	0.924528		1.54757	1.30829
		276	N-[(9Z)-1-oxo-9-octadecenyl]glycine (3)	62	55	66.6667	61.3333	61.25		54.6667	103.667	58.6667	72.3333		1.18095	0.88172		1.92809	1.42213
		277	(Z)-N-(4-aminobutyl)-9-octadecenamide (4)	1.06	0.126667	0.32	0.243333	0.4375		0.87	2.76667	2.4	2.01222		4.59937	0.820755		1051.28	77.4297
		278	(Z)-N-[3-[[4-[(3-aminopropyl)amino]butyl]amino]propyl]-9-octadecenamide (5)	0.273333	0.23	0.166667	0.176667	0.211667		0.27	0.716667	0.176667	0.387778		1.83202	0.987805		865.522	361.392
		279	(Z)-N-[2-phenylethyl]-9-octadecenamide (6)	>400.0	303	295	>400.0	349.5		>400.0	>400.0	>400.0	>400.0		>1.1	1		>0.3	0.25
		280	(Z)-N-[2-(4-hydroxyphenyl)ethyl]-9-octadecenamide (7)	27	18.6667	21.3333	25.6667	23.1667		19	53.6667	47.6667	40.1111		1.73141	0.703704		7.47373	2.60631
		281	(Z)-N-[2-(3,4-dihydroxyphenyl)ethyl]-9-octadecenamide (8)	2.00667	0.183333	0.113333	0.203333	0.626667		2.43333	17.6667	9.03333	9.71111		15.4965	1.21262		2472.84	60.4298
		282	(Z)-N-[2-(4-hydroxy-3-methoxyphenyl)methyl]-9-octadecenamide (9)	19.6667	3.83333	4.23333	7.16667	8.725		18.6667	26.3333	25.6667	23.5556		2.69978	0.949153		30.943	4.8262
		283	(Z)-N-[2-(5-hydroxy-1H-indol-3-yl)ethyl]-9-octadecenamide (10)	1.53333	0.713333	0.8	1.46667	1.12833		3.06667	5.36667	6.5	4.97778		4.41162	2		390.986	130.435
		284	(Z)-N-[2-(1H-imidazol-4-yl)ethyl]-9-octadecenamide (11)	11.4	10.3667	7.86667	24.6667	13.575		11.8667	20.6667	21.3333	17.9556		1.32269	1.04094		9.74359	9.13101
		285	(Z)-N-[2-(1-methyl-1H-imidazol-4-yl)ethyl]-9-octadecenamide (12)	20.6667	18.0667	24.3333	29.6667	23.1833		20.6667	51	45.6667	39.1111		1.68704	1		7.27693	4.83871
		286	N-[9(Z)-1-oxooctadecen-9-yl]-L-histidine (13)	178	140.333	196	247	190.333		188.333	220.667	283.667	230.889		1.21308	1.05805		0.637343	0.594411
		287	N-[9(Z)-1-oxooctadecen-9-yl]-L-histidine methylester (14)	15.6667	6.4	6.5	15.6667	11.0583		16.3333	22.6667	23.3333	20.7778		1.87892	1.04255		16.991	6.65459
		288	(Z)-N-[(1S)-2-hydroxy-1-(1H-imidazol-4-ylmethyl)ethyl]-9-octadecenamide (15)	2.96667	3.9	2.73333	2.8	3.1		3.03333	10.4667	9.16667	7.55556		2.43728	1.02247		78.6218	34.4653
		289	(Z)-N-[2-(2-pyridyl)ethyl]-9-octadecenamide (16)	38.3333	27.6667	19.6667	32	29.4167		53.6667	70.6667	53.3333	59.2222		2.01322	1.4		6.84381	3.65217
		290	(Z)-N-[2-(2-benzimidazoyl)ethyl]-9-octadecenamide (17)	8.86667	8.13333	8.86667	8.36667	8.55833		22.3333	28.3333	26.3333	25.6667		2.99903	2.5188		35.0422	28.4075
		291	(Z)-N-[4-(2-pyridyl)-aminobutyl]-9-octadecenamide (18)	4.66667	1.13333	0.813333	1.73333	2.08667		13.6667	22	13.6667	16.4444		7.88072	2.92857		377.67	62.7551

## Sheet: S2
	Supplementary Table S2
				Concentration: μM
				DPPH scavenging activity (EC50)	a-Glucosidase inhibitory activity (IC50)	MAO-A inhibition (IC50)	MAO-B inhibition (IC50)	AChE inhibition (IC50)	BChE inhibition (IC50)	Ref
	3-Styrylchromones (A)	1	(E)-3-(4-methoxystyryl)-4H-chromen-4-one (1)	>200	>100					23
		2	(E)-3-(3,4-dimethoxystyryl)-4H-chromen-4-one (2)	>200	>100
		3	(E)-3-(3,4,5-trimethoxystyryl)-4H-chromen-4-one (3)	>200	>100
		4	(E)-6-methoxy-3-(4-methoxystyryl)-4H-chromen-4-one (4)	>200	>100
		5	(E)-6-methoxy-3-(3,4-dimethoxystyryl)-4H-chromen-4-one (5)	>200	>100
		6	(E)-6-methoxy 3-(3,4,5-trimethoxystyryl)-4H-chromen-4-one (6)	>200	>100
		7	(E)-3-(4-fluorostyryl)-6-methoxy-4H-chromen-4-one (7)	>200	>100
		8	(E)-3-(4-chlorostyryl)-6-methoxy-4H-chromen-4-one (8)	>200	57
		9	(E)-3-(4-hydroxystyryl)-4H-chromen-4-one (9)	60	39
		10	(E)-3-(3,4-dihydroxystyryl)-4H-chromen-4-one (10)	17	16
		11	(E)-3-(4-hydroxystyryl)-6-methoxy-4H-chromen-4-one (11)	78	>100
		12	(E)-3-(3,4-dihydroxystyryl)-6-methoxy-4H-chromen-4-one (12)	22	68
		13	(E)-6-hydroxy-3-(4-methoxystyryl)-4H-chromen-4-one (13)	>200	33
		14	(E)-6-hydroxy-3-(4-hydroxystyryl)-4H-chromen-4-one (14)	125	9
		15	(E)-6-hydroxy-3-(3,4-dihydroxystyryl)-4H-chromen-4-one (15)	23	10
		17	3-​[(1E)​-​2-​(4-​fluorophenyl)​ethenyl]​-4H-1-​benzopyran-​4-​one (2)	>200	23
		18	3-​[(1E)​-​2-​(4-​chlorophenyl)​ethenyl]​-4H-​1-​benzopyran-​4-​one (3)	>200	16
		Ascorbic acid		23
		Acarbose			>100
	2-Styrylchromones (B)	30	2-​[(1E)​-​2-​phenylethenyl]​-4H-​1-​benzopyran-​4-​one (1)			0.95	0.24			24
		31	2-​[(1E)​-​2-​(4-​fluorophenyl)​ethenyl]​-4H-​1-​benzopyran-​4-​one (2)			0.59	0.17
		32	2-[(1E)-2-(4-chlorophenyl)ethenyl]-4H-1-benzopyran-4-one (3)			0.29	0.079
		33	2-​[(1E)​-​2-​(4-bromophenyl)​ethenyl]​-4H-​1-​benzopyran-​4-​one (4)			0.33	0.069
		34	2-​[(1E)​-​2-​(4-​methoxyphenyl)​ethenyl]​-4H-​1-​benzopyran-​4-​one (5)			2.3	0.049
		35	2-​[(1E)​-​2-​(3,4-dimethoxy)​ethenyl]​-4H-​1-​benzopyran-​4-​one (6)			25	2.8
		36	6-methoxy-2-​[(1E)​-​2-phenylethenyl]​-4H-​1-​benzopyran-​4-​one (7)			0.2	0.18
		37	2-​[(1E)​-​2-​(4-​fluorophenyl)​ethenyl]-6-methoxy-4H-​1-​benzopyran-​4-​one (8)			0.12	0.064
		38	2-​[(1E)​-​2-​(4-​chlorophenyl)​ethenyl]-6-methoxy-4H-​1-​benzopyran-​4-​one (9)			26	0.017
		39	2-​[(1E)​-​2-​(4-bromophenyl)​ethenyl]-6-methoxy​-4H-​1-​benzopyran-​4-​one (10)			0.53	0.024
		40	6-methoxy-2-​[(1E)​-​2-​(4-​methoxyphenyl)​ethenyl]​-4H-​1-benzopyran-​4-​one (11)			0.21	0.19
		41	2-​[(1E)​-​2-​(3,4-dimethoxy)​ethenyl]-6-methoxy-​4H-​1-​benzopyran-​4-​one (12)			21	0.68
		42	7-methoxy-2-​[(1E)​-​2-phenylethenyl]​-4H-​1-​benzopyran-​4-​one (13)			26	0.22
		43	2-​[(1E)​-​2-​(4-​fluorophenyl)​ethenyl]-7-methoxy-4H-​1-​benzopyran-​4-​one (14)			35	0.12
		44	2-​[(1E)​-​2-​(4-​chlorophenyl)​ethenyl]-7-methoxy-4H-​1-​benzopyran-​4-​one (15)			>100	0.27
		45	2-​[(1E)​-​2-​(4-bromophenyl)​ethenyl]-7-methoxy​-4H-​1-​benzopyran-​4-​one (16)			>100	0.45
		46	7-methoxy-2-​[(1E)​-​2-​(4-​methoxyphenyl)​ethenyl]​-4H-​1-​benzopyran-​4-​one (17)			72	1.4
		47	2-​[(1E)​-​2-​(3,4-dimethoxy)​ethenyl]-7-methoxy-​4H-​1-​benzopyran-​4-​one (18)			>100	10
		Pargyline				4.6	0.22
	2-Azolylchromones (E)	78	2-​(1H-​pyrrol-​1-​yl)​-4H-​1-​benzopyran-​4-​one (1a)			4.56	> 100			27
		79	7-methoxy-2-​(1H-​pyrrol-​1-​yl)​-4H-​1-​benzopyran-​4-​one (1b)			0.32	> 100
		80	6-methoxy-2-​(1H-​pyrrol-​1-​yl)​-4H-​1-​benzopyran-​4-​one (1c)			14.12	7.93
		81	2-​(1H-pyrazol-​1-​yl)​-4H-​1-​benzopyran-​4-​one (2a)			1.83	2.87
		82	7-methoxy-2-​(1H-​pyrazol-​1-​yl)​-4H-​1-​benzopyran-​4-​one (2b)			0.14	> 100
		83	6-methoxy-2-​(1H-​pyrazol-​1-​yl)​-4H-​1-​benzopyran-​4-​one (2c)			2.07	1.04
		84	2-​(1H-imidazol-​1-​yl)​-4H-​1-​benzopyran-​4-​one (3a)			25.36	6.11
		85	2-​(1H-​imidazol-​1-​yl)​-7-methoxy-4H-​1-​benzopyran-​4-​one (3b)			6.73	19.5
		86	2-​(1H-imidazol-​1-​yl)​-6-methoxy-4H-​1-​benzopyran-​4-​one (3c)			26.25	5.29
		87	2-​(1H-​1,​2,​4-​triazol-​1-​yl)​-4H-​1-​benzopyran-​4-​one (4a)			0.11	0.028
		88	7-​methoxy-​2-​(1H-​1,​2,​4-​triazol-​1-​yl)​-4H-​1-​benzopyran-​4-​one (4b)			0.023	1.64
		89	6-methoxy-​2-​(1H-​1,​2,​4-​triazol-​1-​yl)​-4H-​1-​benzopyran-​4-​one (4c)			0.15	0.019
		90	2-(1H-​1,​2,​3-triazol-​1-​yl)​-4H-​1-​benzopyran-​4-​one (5a)			4.43	0.73
		91	7-​methoxy-​2-​(1H-​1,​2,​3-​triazol-​1-​yl)​-4H-​1-​benzopyran-​4-​one (5b)			0.59	15.65
		92	6-​methoxy-​2-​(1H-​1,​2,​3-​triazol-​1-​yl)​-4H-​1-​benzopyran-​4-​one (5c)			6.18	0.28
		93	2-​(1H-​indol-​1-​yl)​-​4H-​1-​benzopyran-​4-​one (6a)			6.19	2.56
		94	2-​(1H-indol-​1-​yl)​-7-​methoxy-​4H-​1-​benzopyran-​4-​one (6b)			1	2.01
		95	2-​(1H-​indol-​1-​yl)​-6-​methoxy-​4H-​1-​benzopyran-​4-​one (6c)			> 100	0.28
		96	2-​(1H-indazol-​1-​yl)​-​4H-​1-​benzopyran-​4-​one (7a)			1.58	> 100
		97	2-​(1H-​indazol-​1-​yl)​-7-​methoxy-​4H-​1-​benzopyran-​4-​one (7b)			0.19	> 100
		98	2-​(1H-​indazol-​1-​yl)​-6-​methoxy-​4H-​1-​benzopyran-​4-​one (7c)			34.37	25.07
		99	2-​(1H-​benzimidazol-​1-​yl)​-4H-​1-​benzopyran-​4-​one (8a)			> 100	> 100
		100	2-​(1H-​benzimidazol-​1-​yl)​-7-​methoxy-​4H-​1-​benzopyran-​4-​one (8b)			3.41	2.73
		101	2-​(1H-​benzimidazol-​1-​yl)​-6-​methoxy-​4H-​1-​benzopyran-​4-​one (8c)			> 100	0.27
		Pargyline				4.57	0.22
	3-Benzylidenechromones (F)	122	(3E)-2,3-dihydro-3-(phenylmethylene)-4H-1-benzopyran-4-one (1)	>200	>100					27
		123	(3E)-2,3-dihydro-3-[(4-hydroxyphenyl)methylene]-4H-1-benzopyran-4-one (2)	>200	79
		124	(3E)-2,3-dihydro-3-[(3,4-dihydroxyphenyl)methylene]-4H-1-benzopyran-4-one (3)	13	47
		125	(3E)-2,3-dihydro-3-[(4-methoxyphenyl)methylene]-4H-1-benzopyran-4-one (4)	>200	93
		126	(3E)-2,3-dihydro-3-[(3,4-dimethoxyphenyl)methylene]-4H-1-benzopyran-4-one (5)	>200	>100
		127	(3E)-2,3-dihydro-3-[(4-dimethylaminophenyl)methylene]-4H-1-benzopyran-4-one (6)	>200	>100
		128	(3E)-2,3-dihydro-3-[(4-fluorophenyl)methylene]-4H-1-benzopyran-4-one (7)	>200	>100
		129	(3E)-3-[(4-chlorophenyl)methylene]-2,3-dihydro-4H-1-benzopyran-4-one (8)	>200	>100
		130	(3E)-2,3-dihydro-7-hydroxy-3-[(4-hydroxyphenyl)methylene]-4H-1-benzopyran-4-one (9)	>200	>100
		131	(3E)-2,3-dihydro-3-[(3,4-dihydroxyphenyl)methylene]-7-hydroxy-4H-1-benzopyran-4-one (10)	>200	15
		132	(3E)-2,3-dihydro-7-hydroxy-3-[(4-methoxyphenyl)methylene]-4H-1-benzopyran-4-one (11)	>200	25
		133	(3E)-2,3-dihydro-3-[(4-dimethylaminophenyl)methylene]-7-hydroxy-4H-1-benzopyran-4-one (12)	>200	>100
		134	(3E)-2,3-dihydro-7-methoxy-3-(phenylmethylene)-4H-1-benzopyran-4-one (13)	>200	>100
		135	(3E)-2,3-dihydro-3-[(4-hydroxyphenyl)methylene]-7-methoxy-4H-1-benzopyran-4-one (14)	>200	>100
		136	(3E)-2,3-dihydro-3-[(3,4-dihydroxyphenyl)methylene]-7-methoxy-4H-1-benzopyran-4-one (15)	13	28
		137	(3E)-2,3-dihydro-7-methoxy-3-[(4-methoxyphenyl)methylene]-4H-1-benzopyran-4-one (16)	>200	>100
		138	(3E)-2,3-dihydro-3-[(4-dimethylaminophenyl)methylene]-7-methoxy-4H-1-benzopyran-4-one (17)	>200	>100
		Ascorbic acid		12
		Acarbose			900
	Pyrano[4,3-b]chromones (G)	139	3-ethoxy-​4,4a-​dihydro-3H,10H-​pyrano[4,3-​b]​[1]​benzopyran-​10-​one (1)			53	> 100	> 100	> 100	28
		140	3-​butoxy-​4,4a-​dihydro-3H,10H-​pyrano[4,3-​b]​[1]​benzopyran-​10-one (2)			95	1.2	67	44
		141	4,4a-​dihydro-​3-​methoxy-​3-​methyl-​3H,10H-​pyrano[4,3-​b]​[1]​benzopyran-​10-one (3)			28	68	> 100	> 100
		142	8-chloro-3-ethoxy-​4,4a-​dihydro-3H,10H-​pyrano[4,3-​b]​[1]​benzopyran-​10-one (4)			29	1.5	> 100	> 100
		143	3-​butoxy-​8-chloro-4,4a-​dihydro-3H,10H-pyrano[4,3-​b]​[1]​benzopyran-​10-one (5)			84	0.54	76	> 100
		144	8-chloro-4,4a-​dihydro-​3-​methoxy-​3-​methyl-​3H,​10H-​pyrano[4,​3-​b]​[1]​benzopyran-​10-one (6)			7.7	2.8	51	> 100
		145	3-ethoxy-​4,4a-​dihydro-8-methoxy-3H,10H-pyrano[4,3-​b]​[1]​benzopyran-​10-one (7)			15	21	94	> 100
		146	3-​butoxy-​4,4a-​dihydro-8-methoxy-3H,10H-​pyrano[4,3-​b]​[1]​benzopyran-​10-one (8)			25	0.39	> 100	> 100
		147	4,4a-​dihydro-​3,8-​dimethoxy-​3-​methyl-​3H,10H-​pyrano[4,3-​b]​[1]​benzopyran-​10-one (9)			19	40	> 100	> 100
		149	(11): Diasteromer of (1)			35	35	> 100	> 100
		150	(12): Diasteromer of (2)			25	3.2	> 100	20
		151	(13): Diasteromer of (3)			34	34	> 100	> 100
		152	(14): Diasteromer of (4)			33	1.7	> 100	> 100
		153	(15): Diasteromer of (5)			> 100	0.2	> 100	21
		154	(16): Diasteromer of (6)			38	1.7	> 100	> 100
		155	(17): Diasteromer of (7)			19	21	> 100	> 100
		156	(18): Diasteromer of (8)			4.3	1.3	> 100	27
		157	(19): Diasteromer of (9)			14	6.8	> 100	> 100
		Pergyline				4.6	0.22
		Neostigmine						0.2	7.1
	3-Styrylchromenes (I)	171	(E)-3-styryl-2H-chromene (1)			>10	0.041			30
		172	(E)-3-(4-methoxystyryl)-2H-chromene (2)			>10	0.1
		173	(E)-3-(4-fluorostyryl)-2H-chromene (3)			>10	0.01
		174	(E)-3-(4-chlorostyryl)-2H-chromene (4)			>10	0.021
		175	(E)-6-methoxy-3-styryl-2H-chromene (5)			>10	0.02
		176	(E)-6-methoxy-3-(4-methoxystyryl)-2H-chromene (6)			>10	>10
		177	(E)-3-(4-fluorostyryl)-6-methoxy-2H-chromene (7)			>10	0.015
		178	(E)-3-(4-chlorostyryl)-6-methoxy-2H-chromene (8)			>10	10
		179	(E)-7-methoxy-3-styryl-2H-chromene (9)			>10	0.042
		180	(E)-7-methoxy-3-(4-methoxystyryl)-2H-chromene (10)			>10	10
		181	(E)-3-(4-fluorostyryl)-7-methoxy-2H-chromene (11)			>10	0.016
		182	(E)-3-(4-cholorostyryl)-7-methoxy-2H-chromene (12)			>10	0.026
		183	(E)-6-chloro-3-styryl-2H-chromene (13)			>10	0.048
		184	(E)-6-chloro-3-(4-methoxystyryl)-2H-chromene (14)			>10	4
		185	(E)-6-chloro-3-(4-fluorostyryl)-2H-chromene (15)			>10	0.019
		186	(E)-6-chloro-3-(4-chlorostyryl)-2H-chromene (16)			>10	0.95
		Pargyline				4.6	0.22
	Cinnamic acid phenethyl esters (M)	229	(2E)​-3-​(​4-​hydroxy-3-methoxyphenyl)​-​2-​propenoic acid 2-​(3,4-​dihydroxyphenyl)​ethyl ester (1)	18		> 10	> 10	> 10	> 10	55
		230	(2E)​-3-​(​4-hydroxyphenyl)​-​2-​propenoic acid 2-​(3,4-​dihydroxyphenyl)​ethyl ester (2)	21		> 10	1.3	> 10	4.9
		231	(2E)​-3-​(3,​4-dihydroxyphenyl)​-​2-​propenoic acid 2-​(3,4-​dihydroxyphenyl)​ethyl ester (3)	11		> 10	> 10	> 10	> 10
		232	(2E)​-3-​(​4-​hydroxy-3-methoxyphenyl)​-​2-​propenoic acid 2-​(4-​hydroxyphenyl)​ethyl ester (4)	87		> 10	1.6	> 10	> 10
		233	(2E)​-3-​(​4-hydroxyphenyl)​-​2-​propenoic acid 2-​(4-​hydroxyphenyl)​ethyl ester (5)	> 250		> 10	0.35	> 10	> 10
		234	(2E)​-3-​(3,​4-dihydroxyphenyl)​-​2-​propenoic acid 2-​(4-​hydroxyphenyl)​ethyl ester (6)	20		> 10	> 10	> 10	> 10
		235	(2E)​-3-​phenyl​-​2-​propenoic acid 2-(4-hydroxy​phenyl)​ethyl ester (7)	> 250		> 10	0.67	> 10	6.8
		236	(2E)​-3-​(​4-​hydroxyphenyl)​-​2-propenoic acid 2-​phenyl​ethyl ester (8)	> 250		> 10	0.013	> 10	> 10
		237	(2E)​-3-​(3,​4-​dihydroxyphenyl)​-​2-propenoic acid 2-​phenyl​ethyl ester (9)	18		> 10	0.1	> 10	> 10
		238	(2E)​-3-​phenyl​-​2-propenoic acid 2-​phenyl​ethyl ester (10)	> 250		> 10	0.65	> 10	> 10
		Ascorbic acid		23
		Pargyline				4.6	0.22
		Neostigmine						0.2	7.1
	Phenylpronanoid amides (O)	250	N-p-coumaroylvanillylamine (1)	70		> 10	> 10	> 10	> 10	55
		251	N-feruloylvanillylamine (2)	28		> 10	> 10	> 10	> 10
		252	N-caffeoylvanillylamine (3)	16		> 10	> 10	> 10	> 10
		253	N-p-coumaroyltyramine (4)	> 250		> 10	2	> 10	> 10
		254	N-feruloyltyramine (5)	41		> 10	> 10	> 10	> 10
		255	N-caffeoyltyramine (6)	16		> 10	> 10	> 10	> 10
		256	N-p-coumaroyldopamine (7)	16		> 10	1.9	> 10	> 10
		257	N-feruloyldopamine (8)	15		> 10	> 10	> 10	> 10
		258	N-caffeoyldopamine (9)	8.7		> 10	> 10	> 10	> 10
		259	N-p-coumaroylserotonin (10)	13		> 10	1.2	> 10	> 10
		260	N-feruloylserotonin (11)	14		> 10	> 10	> 10	> 10
		261	N-caffeoylserotonin (12)	8.1		> 10	> 10	> 10	> 10
	Piperic acid amides (P)	262	1-[5-(1,3-benzodioxol-5-yl)-1-oxo-2,4-pentadienyl]piperidine (1)	> 250	>100					56
		263	N-piperoylethanolamine (2)	> 250	>100
		264	N-piperoylputrescine (3)	> 250	>100
		265	N-piperoylcadaverine (4)	> 250	>100
		266	N-piperoylphenethylamine (5)	> 250	30
		267	N-piperoyl-3-phenylpropylamine (6)	> 250	29
		268	N-piperoyltyramine (7)	> 250	40
		269	N-piperoyldopamine (8)	28	46
		270	N-piperoylvanillylamine (9)	140	>100
		271	N-piperoylserotonin (10)	20	46
		272	N-piperoylhistamine (11)	> 250	>100
		Ascorbic acid		12
		Acarbose			900

## Sheet: S3
		Supplementary Table S3 Anti-HIV activity (SI=CC50/EC50)
		Chromones
		A		Ref. 33				I			Ref. 45			L			Ref. 47
		3-Styrylchromones	Compd	CC50 (μM)	EC50 (μM)	SI		3-Styryl-2H-chromenes	Compd	CC50 (μM)	EC50 (μM)	SI		Chalcones		CC50 (μM)	EC50 (μM)	SI
		1	1	528.45	>800	<1		1	171	212.46	>400	<1		1	214	323.627	>400	<1
		2	2	463.38	>800	<1		2	172	143.29	>400	<1		2	215	178.21	>400	<1
		3	3	629.23	>800	<1		3	173	252.55	>400	<1		3	216	>400	>400	><1
		4	4	5.87	>800	<1		4	174	177.79	>400	<1		4	217	387.87	>400	<1
		5	5	>800	>800	><1		5	175	190.61	>400	<1		5	218	80.73	>400	<1
		6	6	3.39	>800	<1		6	176	181.78	>400	<1		6	219	200.04	>400	<1
		7	7	435.71	>800	<1		7	177	143.57	>400	<1		7	220	34.44	>400	<1
		8	8	270.56	>800	<1		8	178	208.92	>400	<1		8	221	38.78	>400	<1
		9	9	13.76	>800	<1		9	179	116.83	>400	<1		9	222	205.35	>400	<1
		10	10	12.92	>800	<1		10	180	201.75	>400	<1		10	223	191.73	>400	<1
		11	11	3.26	>800	<1		11	181	169.87	>400	<1		11	224	369.64	>400	<1
		12	12	59.91	>800	<1		12	182	182.35	>400	<1		12	225	32.54	>400	<1
		13	13	223.28	>800	<1		13	183	103.4	>400	<1		13	226	235.92	>400	<1
		14	14	3.59	>800	<1		14	184	157.03	>400	<1		14	227	142.54	>400	<1
		15	15	4.76	>800	<1		15	185	280.95	>400	<1		15	228	>400	>400	><1
		Positive controls						16	186	233.57	>400	<1		Positive controls
		Dextran sulfate (μg/ml)		985.6	0.06	17125		Positive controls						Dextran sulfate (μg/ml)		232.68	0.777	300
		Curdlan sulfate (μg/ml)		>1000	0.14	>7002		Dextran sulfate (μg/ml)		498.25	0.26	1935		Curdlan sulfate (μg/ml)		>1000	0.172	>5805
		Azidothymidine		222.2	0.011	20421		Curdlan sulfate (μg/ml)		931.35	0.15	6028		Azidothymidine		53.004	0.026	2017
		2',3'-Dideoxycytidine		2511.59	1.03	2445		Azidothymidine		130.32	0.013	10403		2',3'-Dideoxycytidine		1858.63	1.113	1670
								2',3'-Dideoxycytidine		2160.31	1.13	1916		Azidothymidine		130.32	0.013	10403
														2',3'-Dideoxycytidine		2160.31	1.13	1916
		Esters
		N			Ref. 49
		Piperic acid esters		CC50 (μM)	EC50 (μM)	SI
		1	239	266	>400	<1
		2	240	322	>400	<1
		3	241	119	>400	<1
		4	242	>400	>400	><1
		5	243	>400	>400	><1
		6	244	137	>400	<1
		7	245	>400	>400	><1
		8	246	390	>400	<1
		9	247	>400	>400	><1
		10	248	>400	>400	><1
		11	249	>400	>400	><1
		Positive controls
		Dextran sulfate (μg/ml)		233	0.777	300
		Curdlan sulfate (μg/ml)		>1000	0.172	>5805
		Azidothymidine		53	0.026	2017
		2',3'-Dideoxycytidine		1859	1.113	1670
		Amides
		O			Ref. 50			P			Ref. 51			Q			Ref. 52
		Phenylpropanoid amides		CC50 (μM)	EC50 (μM)	SI		Piperic acid amides		CC50 (μM)	EC50 (μM)	SI		Oleoylamides		CC50 (μM)	EC50 (μM)	SI
		1	250	196.84	>400	<1		1	262	324	>800	<1		1	274	>400	>400	><1
		2	251	226.11	>400	<1		2	263	253	>800	<1		2	275	213.99	>400	<1
		3	252	121.51	>400	<1		3	264	112	>800	<1		3	276	120.12	>400	<1
		4	253	30.19	>400	<1		4	265	89	>800	<1		4	277	39.49	>400	<1
		5	254	192.25	>400	<1		5	266	36	>800	<1		5	278	6.89	>400	<1
		6	255	158.56	>400	<1		6	267	279	>800	<1		6	279	>400	>400	><1
		7	256	49.75	>400	<1		7	268	2	>800	<1		7	280	258.32	>400	<1
		8	257	51.16	>400	<1		8	269	46	>800	<1		8	281	183.84	>400	<1
		9	258	43.74	>400	<1		9	270	688	>800	<1		9	282	400	>400	<1
		10	259	220.69	>400	<1		10	271	279	>800	<1		10	283	304.91	>400	<1
		11	260	193.13	>400	<1		11	272	32	>800	<1		11	284	172.9	>400	<1
		12	261	47.16	>400	<1		12	273	175	>800	<1		12	285	170.48	>400	<1
		Positive controls						Positive controls						13	286	92.57	>400	<1
		Dextran sulfate (μg/ml)		620.5	0.05	12363		Dextran sulfate (μg/ml)		621	0.05	12363		14	287	36.54	>400	<1
		Curdlan sulfate (μg/ml)		>1000	0.18	>5523		Curdlan sulfate (μg/ml)		>1000	0.18	5523		15	288	181.15	>400	<1
		Azidothymidine (μM)		232.87	0.015	15882		Azidothymidine		233	0.015	15882		16	289	371.47	>400	<1
		2’,3’-Dideoxycytidine (μM)		2145.33	1.2	1789		2',3'-Dideoxycytidine		2145	1.2	1789		17	290	239.72	>400	<1
														18	291	38.16	>400	<1
														Positive controls
														Dextran sulfate (μg/ml)		498.25	0.26	1935
														Curdlan sulfate (μg/ml)		931.35	0.15	6028
														Azidothymidine		130.32	0.013	10403
														2',3'-Dideoxycytidine		2160.31	1.13	1916
